# Supplementary material for: Japanese “nameko” mushrooms (Pholiota microspora) produced via sawdust-based cultivation exhibit severe genetic bottleneck associated with a single founder
Source: PubMed Central journal article supplement — Mycoscience. 2022 May 31;63(3):79–87. doi: 10.47371/mycosci.2022.03.002 (PMC10012341; doi:10.47371/mycosci.2022.03.002), 2022-05-31
Supplement: MYC-63-079-s02.pdf [file MYC-63-079-s02.pdf]

**Supplementary Table S2.** Genotypes at the five microsatellite polymorphic loci of cultivated nameko mushrooms (*Pholiota microspora*). The ID codes for the samples were identified in Table 1.

| ID           | <i>Phmi08</i> | <i>Phmi13</i> | <i>Phmi14</i> | <i>Phmi17</i> | <i>Phmi23</i> |
|--------------|---------------|---------------|---------------|---------------|---------------|
| F27          | 139/139       | 157/157       | 154/154       | 222/222       | 307/307       |
| Tohoku-N104  | 139/139       | 157/157       | 154/154       | 222/222       | 307/307       |
| KX-N006      | 139/139       | 160/160       | 154/154       | 220/220       | 307/307       |
| KX-N007      | 139/141       | 160/160       | 154/154       | 220/222       | 307/307       |
| KX-N008      | 139/141       | 160/160       | 154/154       | 220/222       | 307/307       |
| KX-N009      | 139/141       | 160/160       | 154/166       | 220/220       | 307/310       |
| KX-N010      | 139/139       | 160/160       | 154/154       | 220/220       | 307/307       |
| Tohoku-N123  | 139/141       | 157/160       | 154/154       | 222/222       | 307/307       |
| Tohoku-N127  | 139/141       | 157/160       | 154/166       | 220/222       | 307/310       |
| 007          | 139/139       | 157/157       | 154/154       | 222/222       | 307/307       |
| 008          | 139/141       | 157/160       | 154/166       | 220/222       | 307/310       |
| Mori-13      | 139/141       | 157/160       | 154/166       | 220/222       | 307/310       |
| N245         | 139/141       | 157/160       | 154/166       | 222/222       | 307/310       |
| N258         | 139/141       | 157/160       | 154/154       | 222/222       | 307/307       |
| Hokken-N108  | 139/141       | 157/160       | 154/154       | 222/222       | 307/307       |
| Hokken-N160  | 139/141       | 157/160       | 154/166       | 220/222       | 307/310       |
| Fukushima-N1 | 139/141       | 157/160       | 154/154       | 220/222       | 307/310       |
| N123         | 139/141       | 157/160       | 154/166       | 220/222       | 307/310       |
| CP06         | 139/141       | 160/160       | 154/154       | 220/222       | 307/307       |
| K17          | 139/141       | 160/160       | 154/154       | 220/222       | 307/307       |

|               |         |         |         |         |         |
|---------------|---------|---------|---------|---------|---------|
| K18           | 139/141 | 160/160 | 154/154 | 220/222 | 307/307 |
| K19           | 139/141 | 160/160 | 154/154 | 220/222 | 307/307 |
| K40           | 139/141 | 160/160 | 154/154 | 220/222 | 307/307 |
| K41           | 139/141 | 160/160 | 154/154 | 220/222 | 307/307 |
| CP09          | 139/141 | 160/160 | 154/154 | 220/222 | 307/307 |
| CP01          | 139/141 | 160/160 | 154/166 | 220/220 | 307/310 |
| K24           | 139/141 | 157/160 | 154/154 | 220/222 | 307/307 |
| CP03          | 139/141 | 157/160 | 154/154 | 222/222 | 307/307 |
| CP04          | 139/141 | 157/160 | 154/154 | 222/222 | 307/307 |
| CP05          | 139/141 | 157/160 | 154/154 | 222/222 | 307/307 |
| CP07          | 139/141 | 160/160 | 154/154 | 220/222 | 307/307 |
| CP08          | 139/141 | 160/160 | 154/154 | 220/222 | 307/307 |
| CP02          | 139/141 | 160/160 | 154/154 | 220/222 | 307/307 |
| K43           | 139/141 | 160/160 | 154/154 | 220/222 | 307/307 |
| K44           | 139/141 | 160/160 | 154/154 | 220/222 | 307/307 |
| K46           | 139/141 | 160/160 | 154/154 | 220/222 | 307/307 |
| K22           | 139/141 | 160/160 | 154/154 | 220/222 | 307/307 |
| K45           | 139/141 | 160/160 | 154/154 | 220/222 | 307/307 |
| K42           | 139/141 | 160/160 | 154/154 | 220/222 | 307/307 |
| CP10          | 139/141 | 157/160 | 154/154 | 222/222 | 307/307 |
| Original F27* | 139/141 | 157/160 | 154/166 | 220/222 | 307/310 |

\* An estimated genotype of the original strain F27 at the time of collection was determined by the types of alleles found across all the cultivars.
